# Supplementary material for: Instantaneous room temperature bonding of a wide range of non-silicon substrates with poly(dimethylsiloxane) (PDMS) elastomer mediated by a mercaptosilane
Source: Royal Society of Chemistry journal article supplement (doi:10.1039/c5lc00285k), 2015-01-01
Supplement: c5lc00285k1.pdf [file c5lc00285k1.pdf]

## Electronic Supplementary Information

# Instantaneous room temperature bonding of a wide range of non-silicon substrates with poly(dimethylsiloxane) (PDMS) elastomer mediated by a mercaptosilane

*Wenming Wu, Jing Wu, Jae-Heon Kim, and Nae Yoon Lee\**

Department of BioNano Technology, Gachon University, 1342 Seongnam-daero,  
Sujeong-gu, Seongnam-si, Gyeonggi-do, 461-701, Korea

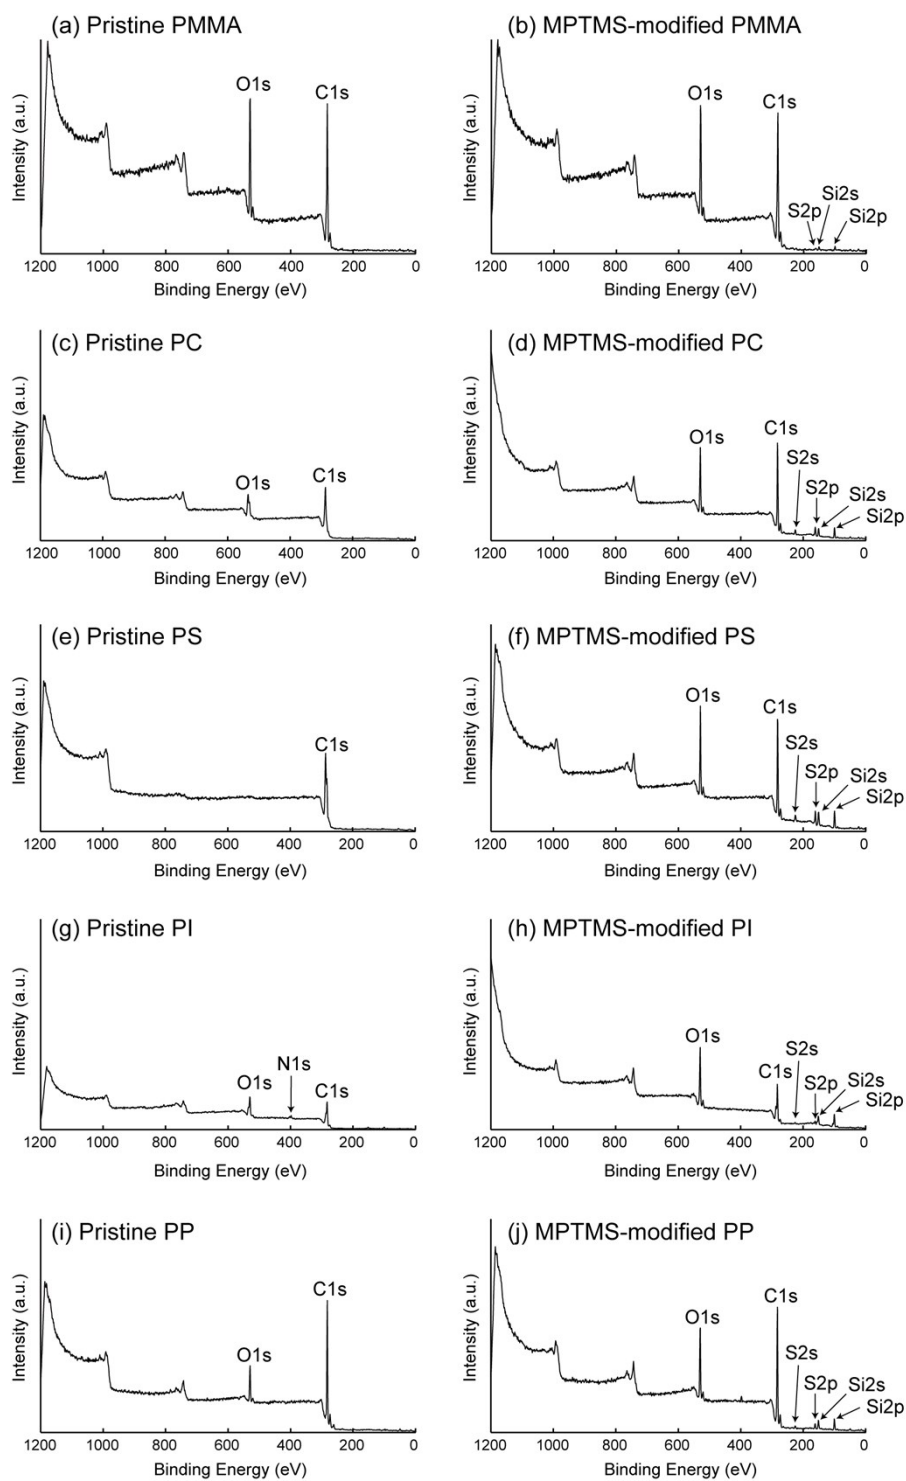

**Fig. S1** Results of XPS analyses performed on PMMA, PC, PS, PI, and PP.

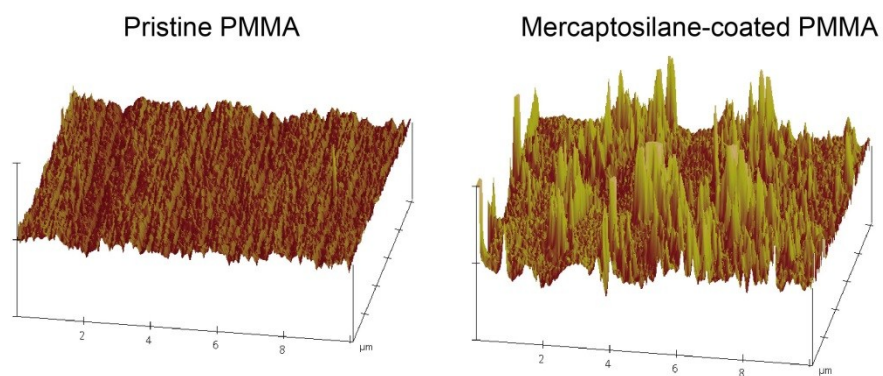

**Fig. S2** Results of surface roughness measurement before and after coating PMMA with mercaptosilane, using atomic force microscope (AFM). The scanned area was 10  $\mu\text{m}$ , and one scale of the Y-axis represents 30 nm.
